# Supplementary material for: The MURAL collection of prostate cancer patient-derived xenografts enables discovery through preclinical models of uro-oncology
Source: PubMed Central journal article supplement (PMC8376965; doi:10.1038/s41467-021-25175-5), 2021-08-19
Supplement: 41467_2021_25175_MOESM1_ESM.pdf [file 41467_2021_25175_MOESM1_ESM.pdf]

## **Supplementary Materials**

- Supplementary Fig. 1: PDX take rates based on the source of tissue
- Supplementary Fig. 2: Enrichment of core signalling pathways in PDXs and generation of organoids from PDXs
- Supplementary Fig. 3: Genomic alterations in MURAL PDX cohort
- Supplementary Fig. 4: Clinical history of patients following tumor collection for research-ready PDXs
- Supplementary Fig. 5: Characterisation of research-ready PDX collection
- Supplementary Fig. 6: Individual data for PCTs and volcano plots per patient
- Supplementary Fig. 7: Pathology assessment of original tissues specimens and PDXs

## Supplementary Figures

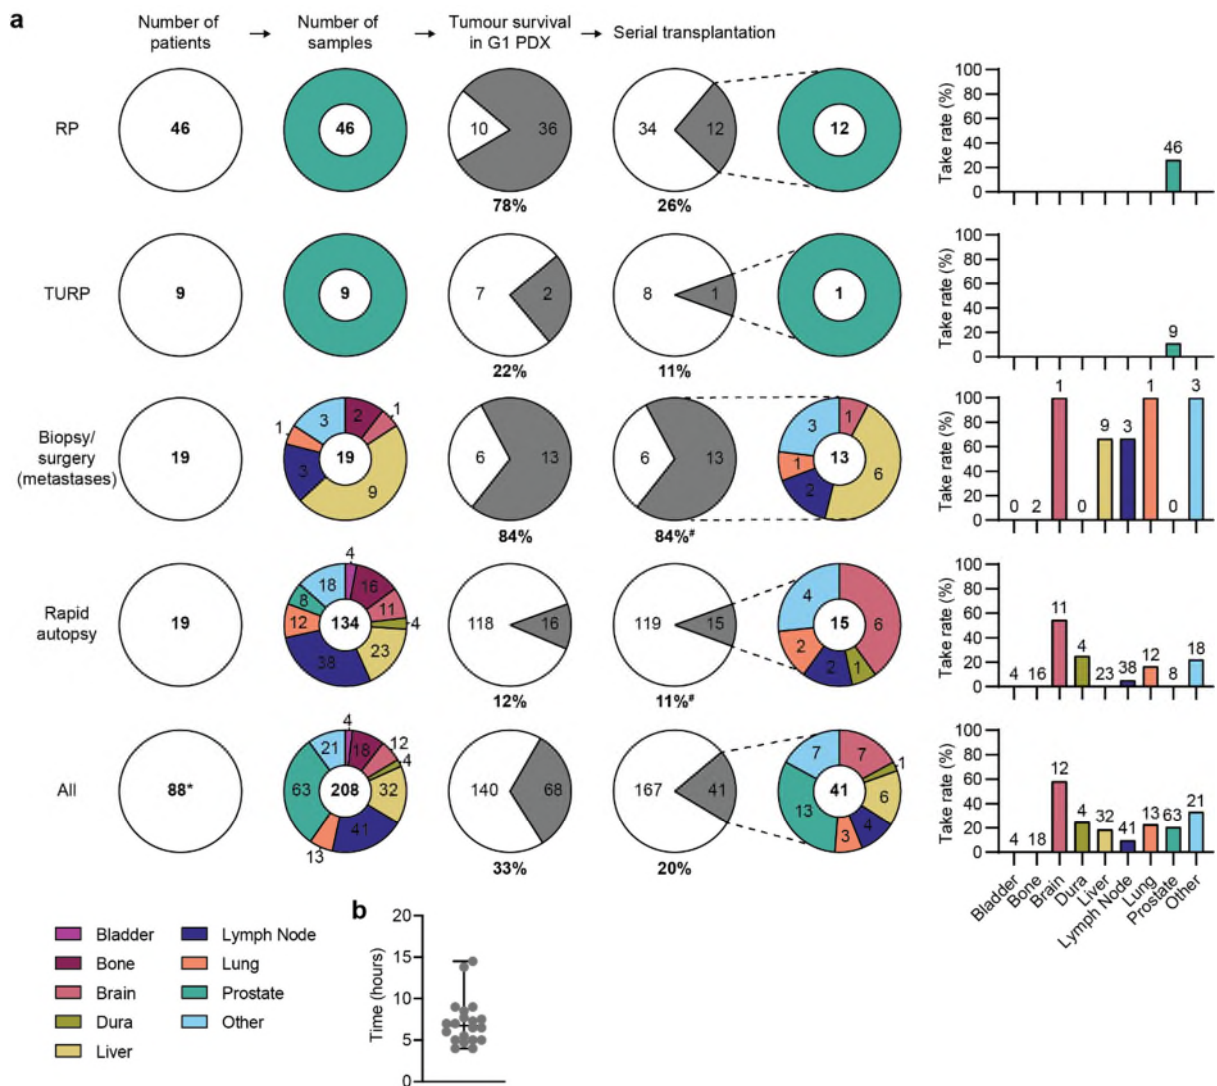

**Supplementary Fig. 1: PDX take rates based on the source of tissue. (a)** Pie charts show the numbers of patients who consented to donate tissue and the numbers of samples obtained from radical prostatectomy (RP), transurethral resection of the prostate (TURP), biopsies or surgery of metastases, and rapid autopsy (\*For 5 patients, tissue was obtained from multiple sources, e.g. RP and surgical resection of a metastasis from the same patient). Colors denote the site that each sample was obtained from. The bar charts show the percentage take rates for each tumor site and tissue source, with numbers indicating the number of samples that were collected. #Among sample sources, there was a significant difference in the number of

tumors that grew as serially transplantable PDXs for biopsy/surgery samples of metastases and rapid autopsy specimens ( $P < 0.0001$ ; two-sided chi-squared test with Fisher's exact approach for post-hoc analysis). **(b)** Plot showing the average time (hours) from death to the start of autopsy for patients who consented to the CASCADE rapid autopsy program ( $n = 20$  patients). Data shown as mean  $\pm$  SEM. Source data are provided as a Source Data file.

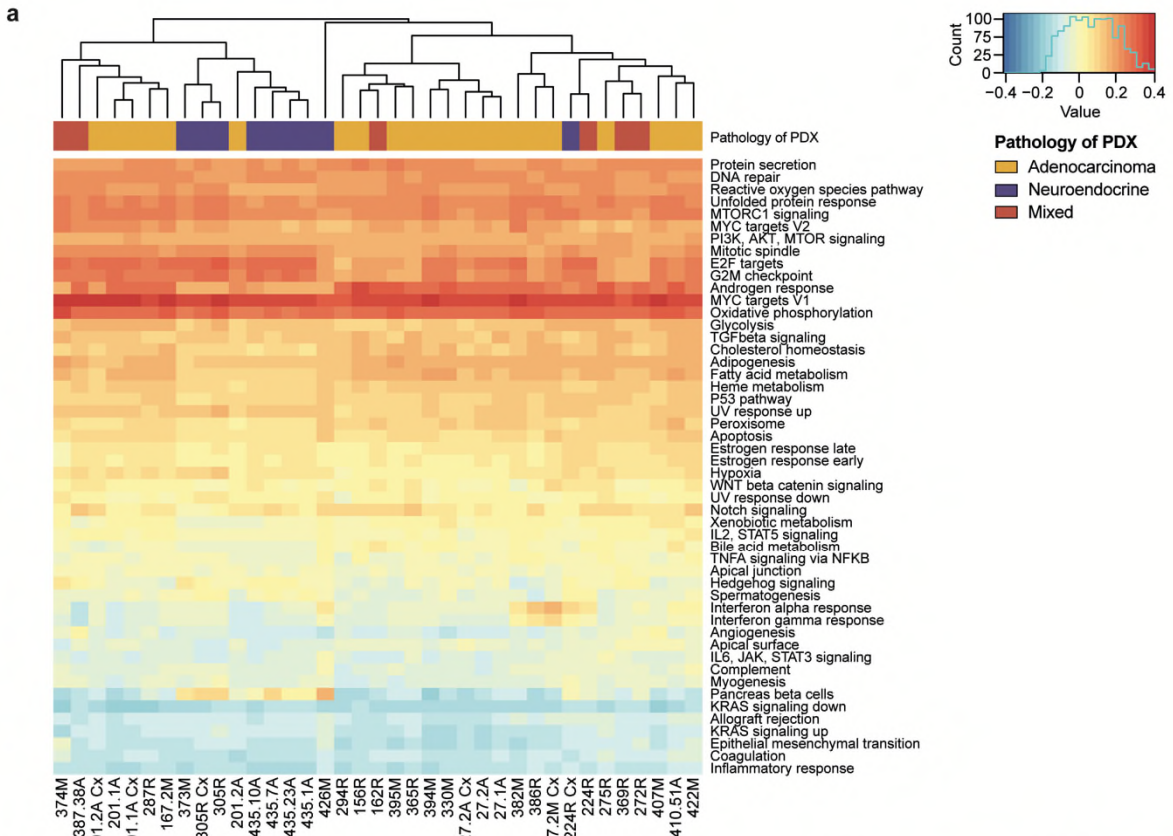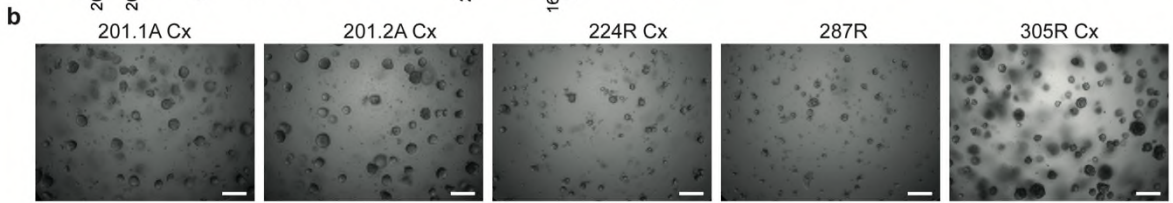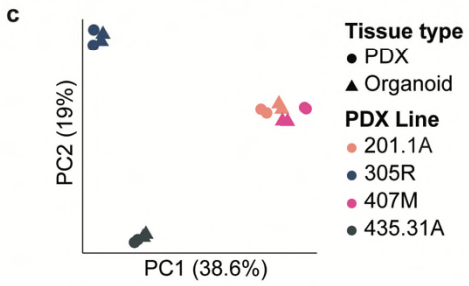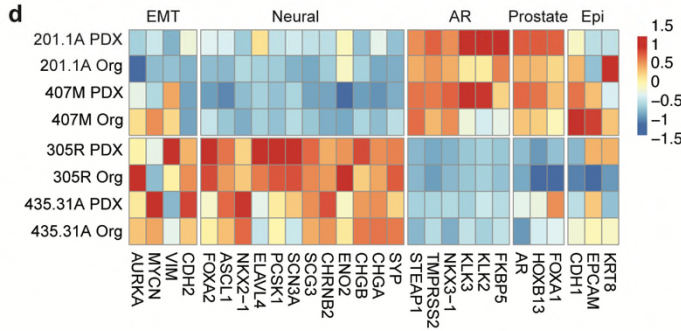

**Supplementary Fig. 2: Enrichment of core signalling pathways in PDXs and generation of organoids from PDXs.** (a) Heatmap and hierarchical clustering of single-sample gene set enrichment analyses (ssGSEA) for the 50 MSigDB hallmark gene sets based on RNA sequencing data for 39 PDXs in testosterone-supplemented and castrate (Cx) mice. The enrichment of each gene set is shown per sample, from low (blue), moderate (yellow) to high (red). Gene sets are hierarchically clustered using ssGSEA scores. Pathology of each PDX is shown, with adenocarcinoma in yellow, neuroendocrine in purple and mixed pathology in orange. (b) Representative brightfield images of five actively growing organoids established from PDXs. Scale bar = 500  $\mu$ m, organoid establishment has been conducted independently at least 3 times for each PDX line (c) PCA plot of gene expression from RNA sequencing based on PC1 and PC2 for PDXs (circles) and organoids (triangles) for four PDXs lines. (e) Heatmap showing the relative gene expression between PDX and organoids (Org) for markers of epithelial to mesenchyme transition (EMT), Neural lineage, Androgen response (AR), prostate lineage and epithelial lineage (Epi)<sup>1</sup>.



**a**

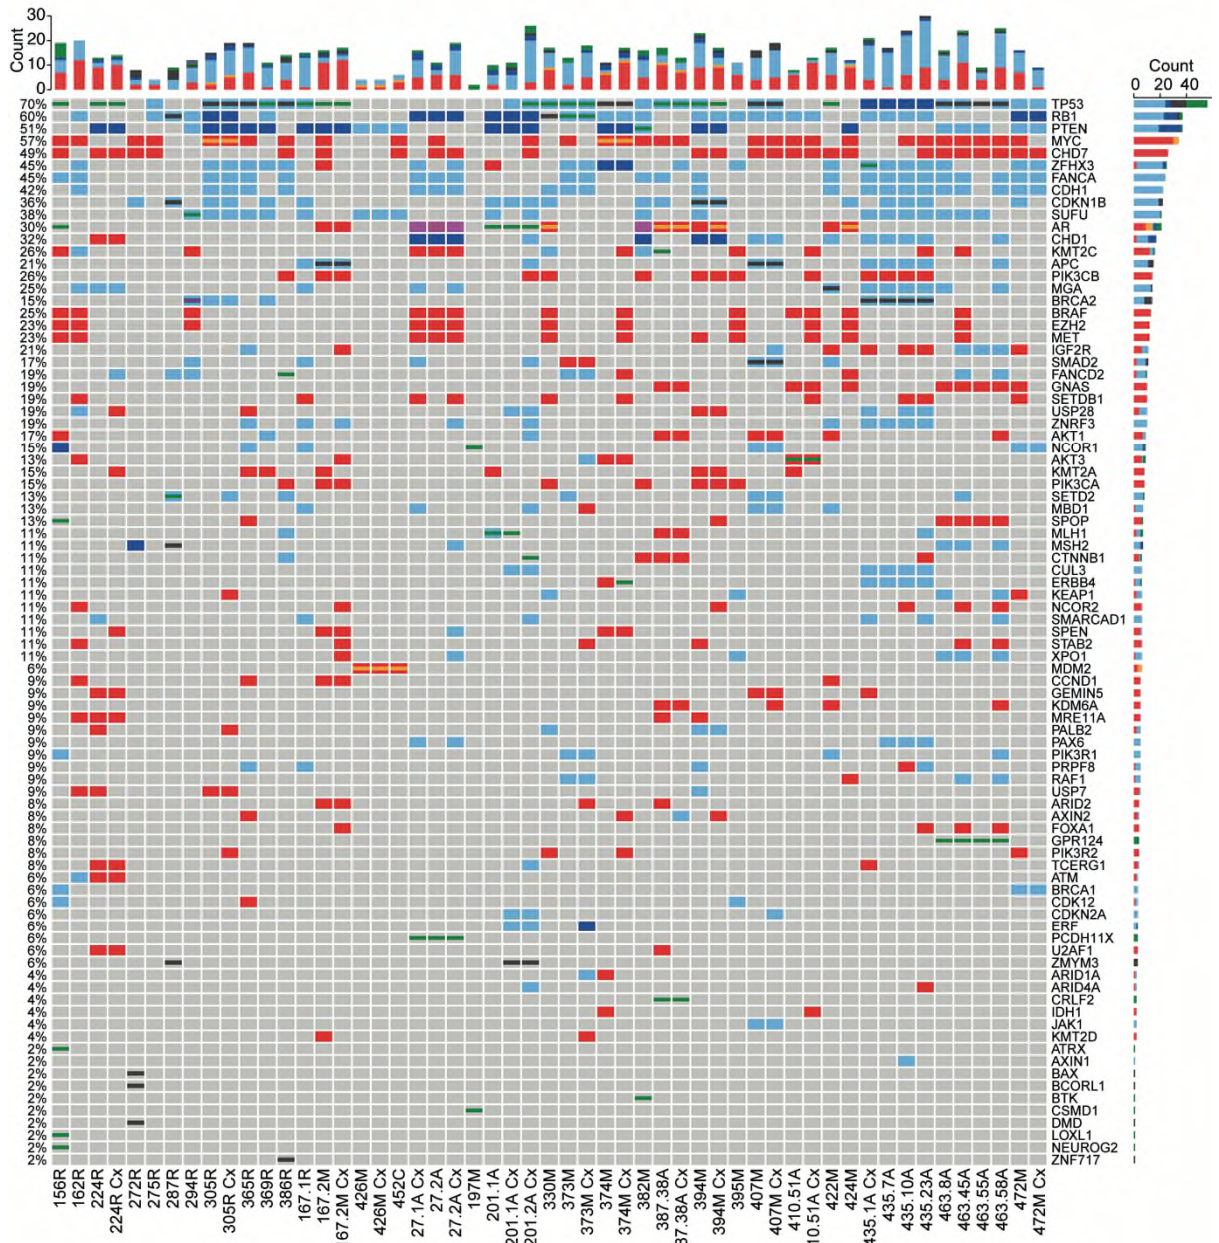

- Alterations**
- Amplification
  - Amplification 8+
  - Deep deletion
  - Copy Loss
  - Stop Gain / Frameshift
  - Mutation
  - Germine
  - Structural Rearrangement

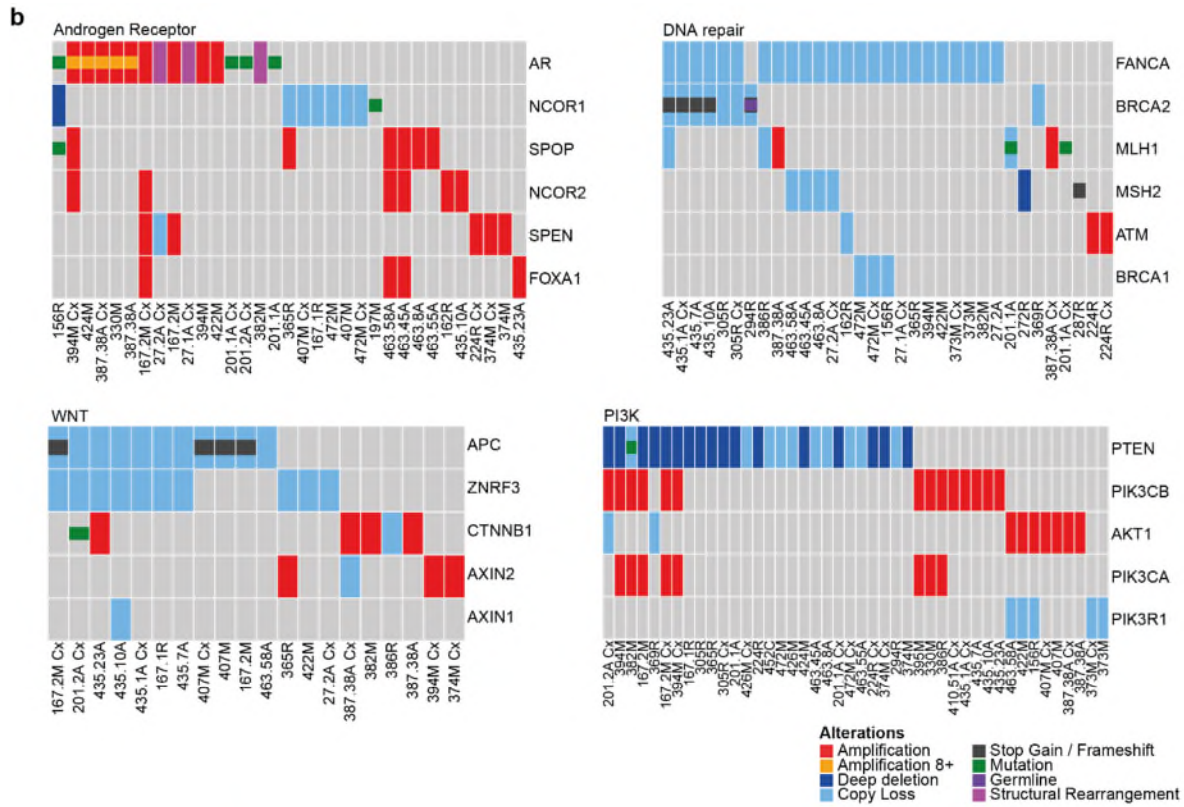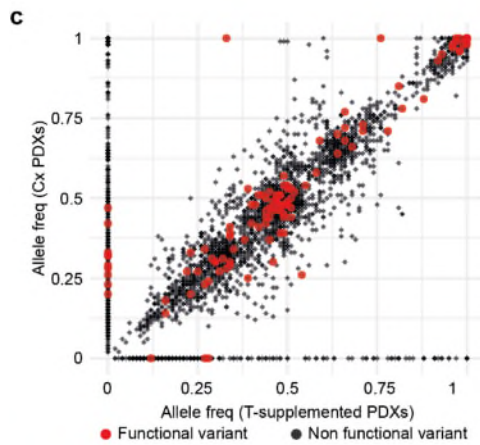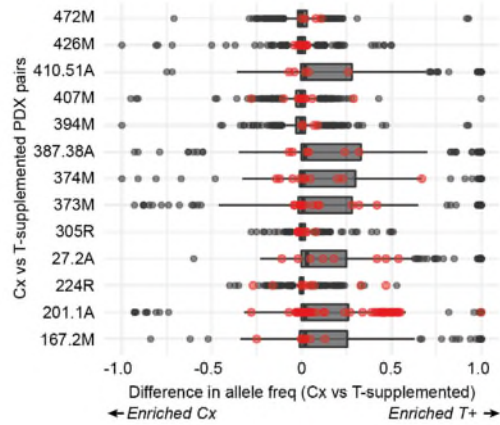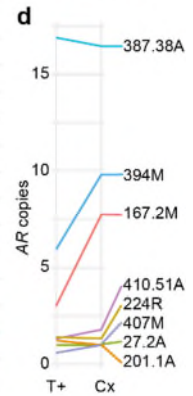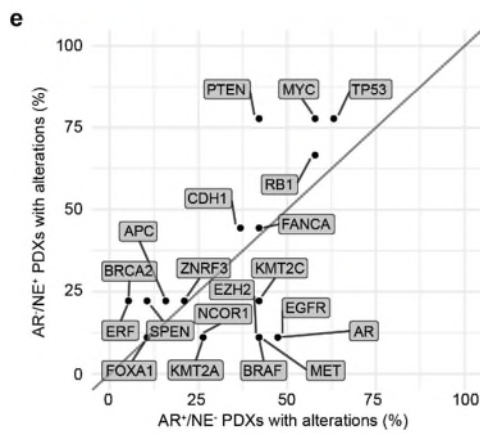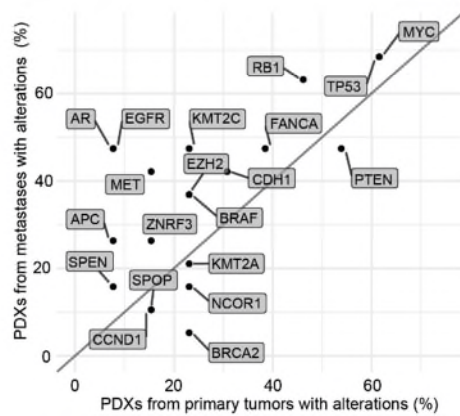

**Supplementary Fig. 3: Genomic alterations in MURAL PDX cohort. (a-b)** Genomic alterations in MURAL PDXs based on targeted DNA sequencing. Somatic nucleotide variations with 0.75 or greater allelic frequency are reported (amplification with 3 or more copies – red; amplification with 8 or more copies – yellow; deep deletion – dark blue; copy loss – light blue; stop gains and frameshift mutations – black; missense mutation – green; germline mutations – purple; structural rearrangements - pink). **(a)** Summary of genomic alterations that have previously reported in patient cohorts<sup>2,3</sup> that occur in MURAL PDXs. The percentage of PDXs across the cohort with one or more alteration/s per gene is shown to the left. The bar plot to the right shows the number of alterations per gene observed across the PDX cohort. The bar plot at the top shows the number of alterations observed in each PDX. Genomic structural rearrangements of the *AR* were reported previously<sup>4</sup>. **(b)** Heatmaps showing alterations in the *AR*, DNA damage repair, Wnt, and PI3 Kinase pathways. **(c)** Scatter plot and boxplot of allele frequencies (allele freq) in matching samples from earlier generation PDXs grown in testosterone-supplemented mice compared to later generation PDXs grown in castrated (Cx) mice. Red dots show functional variants, black dots show non-functional variants. **(d)** Plot *AR* copy numbers in matching PDXs from testosterone supplemented (T+) versus castrated mice. **(e)** Scatterplots showing the percentage of PDXs with any alteration in candidate genes (left:  $AR^-/NE^+$  PDXs versus  $AR^+/NE^-$  PDXs; right: PDXs from metastases versus PDXs from primary tumors).



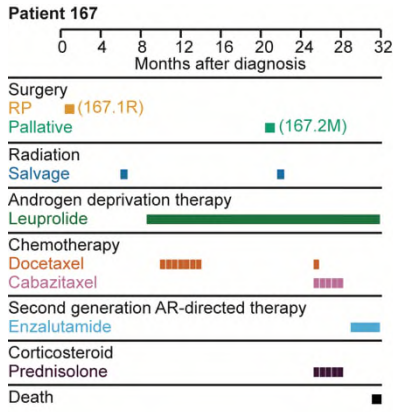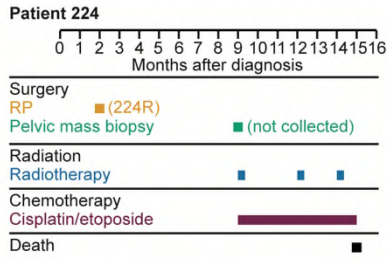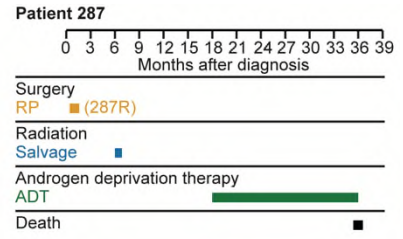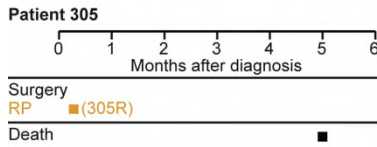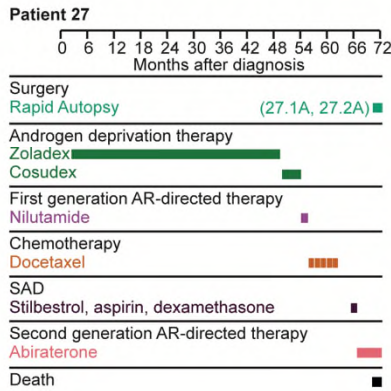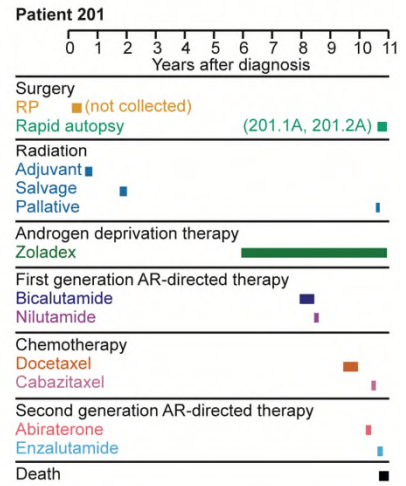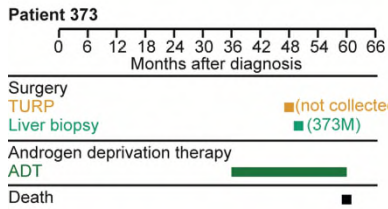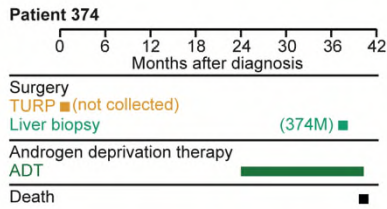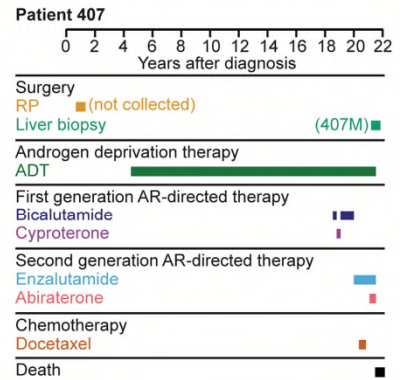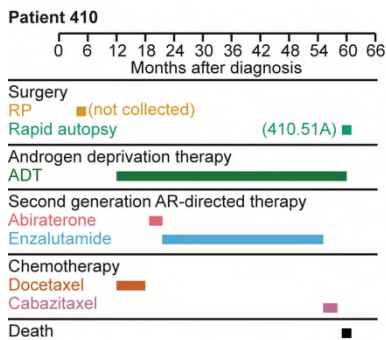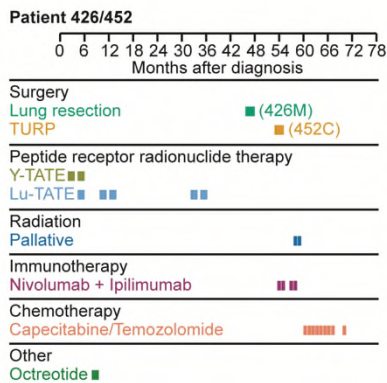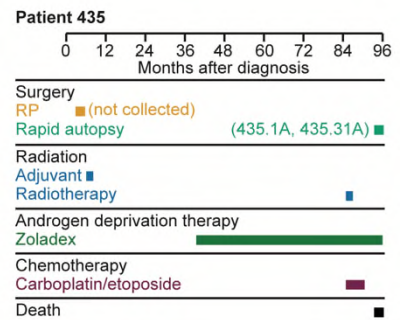

**Supplementary Fig. 4: Clinical history of patients following tumor collection for research-ready PDXs.** Treatment timelines for patients showing each treatment the patient received from diagnosis to current treatment or death. The sample used to establish PDXs is shown in brackets.

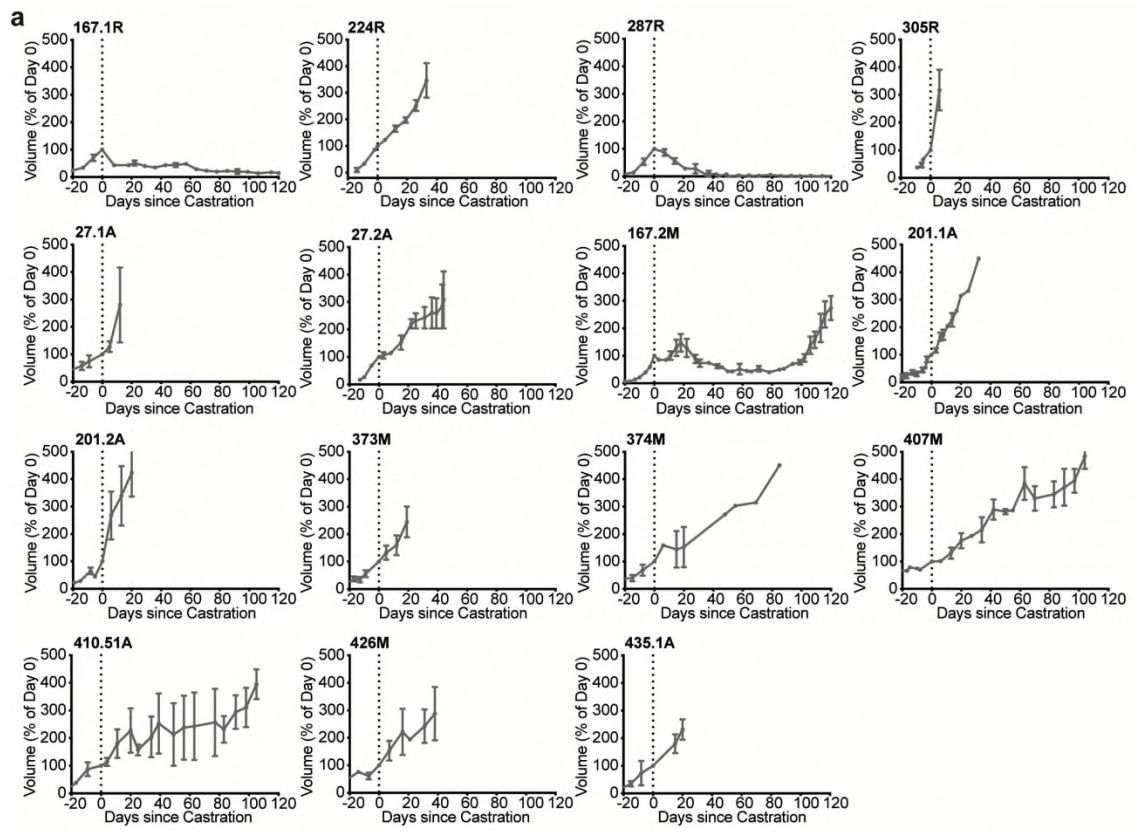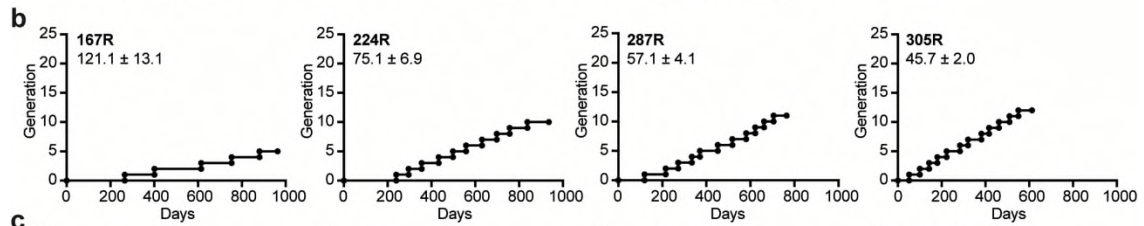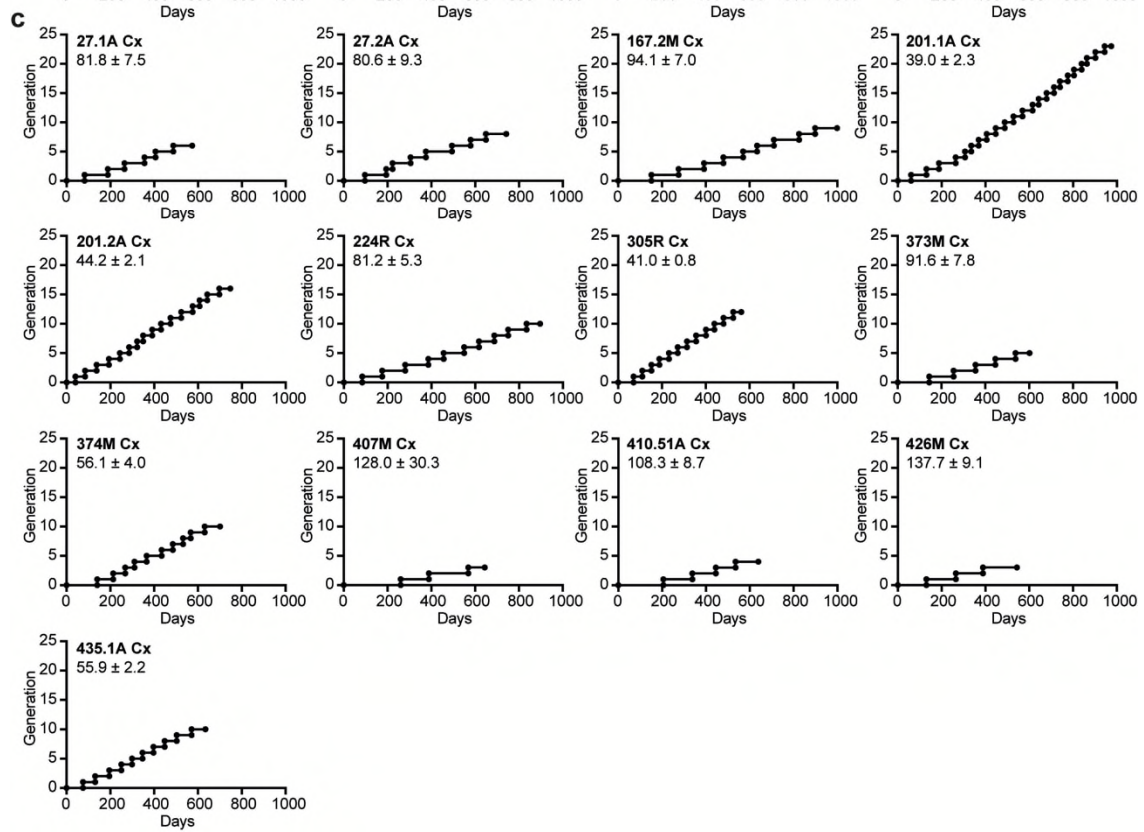



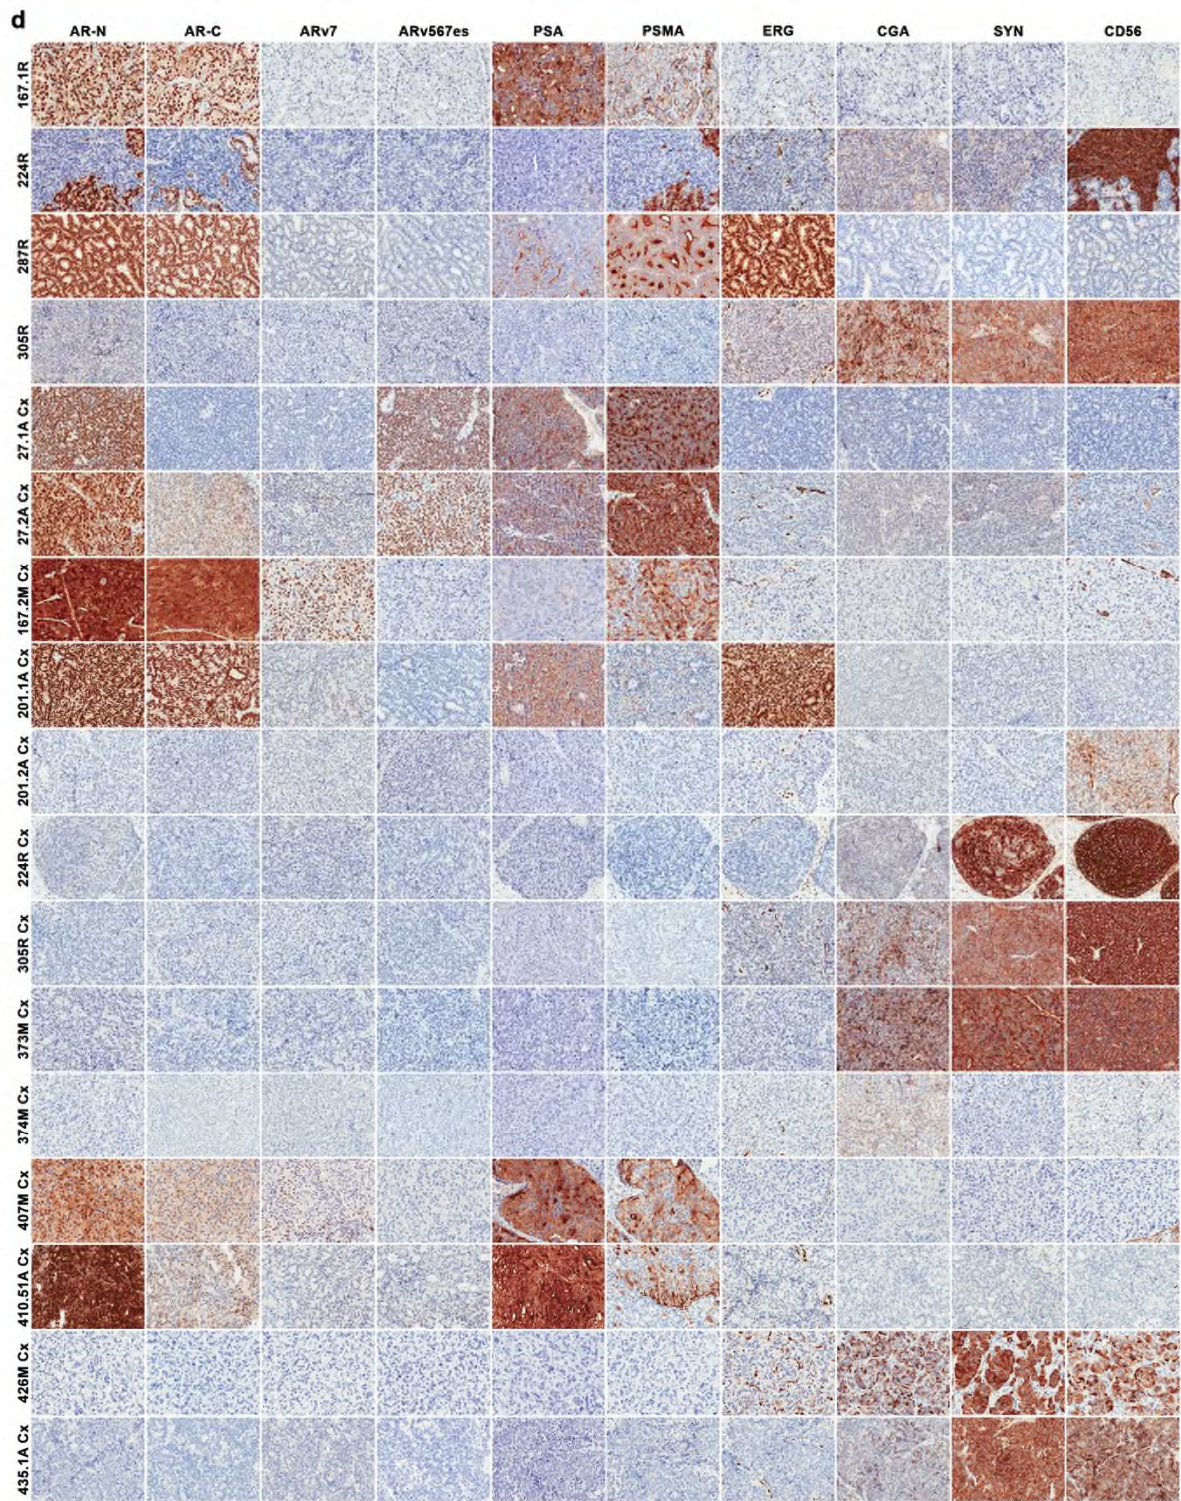

**Supplementary Fig. 5: Characterisation of research-ready PDX collection.** (a) The response of PDXs to castration. Tumors were established in host mice supplemented with testosterone until tumors reached 200mm<sup>3</sup>, at which point host mice were castrated. Graphs show percent change in tumor volume from castration (% Day 0; *n* = 2 for PDX-305R, -27.2A, -374M and -426M; *n* = 3 for PDX-167.1R, -224R, -167.2M, -407M and -435.1A; *n* = 4 for PDX-27.1A, -201.2A, -373M and -410.51A; *n* = 6 for PDX-287R; *n* = 8 for PDX-201.1A; data shown as mean ± SEM). (b-c). The growth trajectory of PDXs across generations for (b) PDXs tumors grown in testosterone-supplemented mice and (c) PDXs grown in castrated mice. Each data point represents a different generation with a ≥10-fold increase in tumor volume. Average time per generation is shown, data shown as mean ± SEM. (d). The expression of prostate cancer biomarkers in PDXs. Representative images of research-ready PDX collection stained for AR N-terminus (AR-N), AR C-terminus (AR-C), AR-V7, ARv567es, prostate specific antigen (PSA), prostate specific membrane antigen (PSMA), and ERG; and the neuroendocrine markers chromogranin A (CGA), synaptophysin (SYN) and CD56. Scale bar = 100 μm. Staining is repeated every 5<sup>th</sup> generation across all PDXs. Source data are provided as a Source Data file.



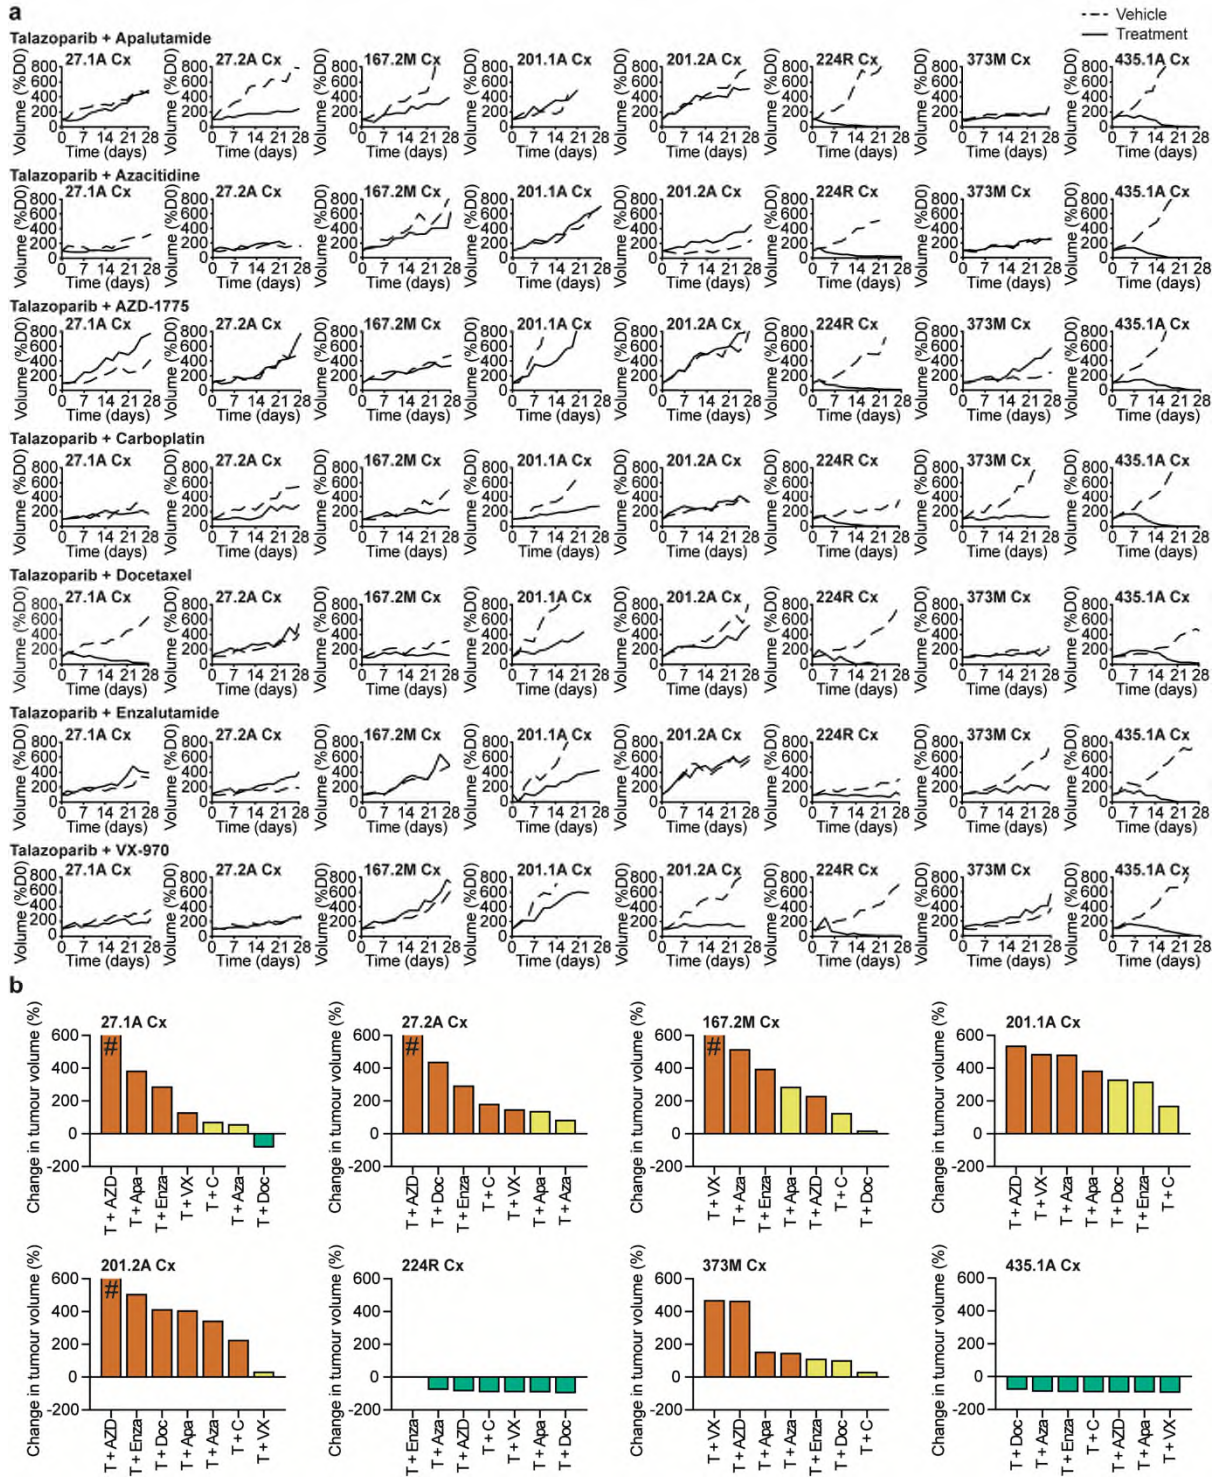

■ Talazoparib   
 ■ Carboplatin   
 ■ Talazoparib + Carboplatin   
 ■ Vehicle

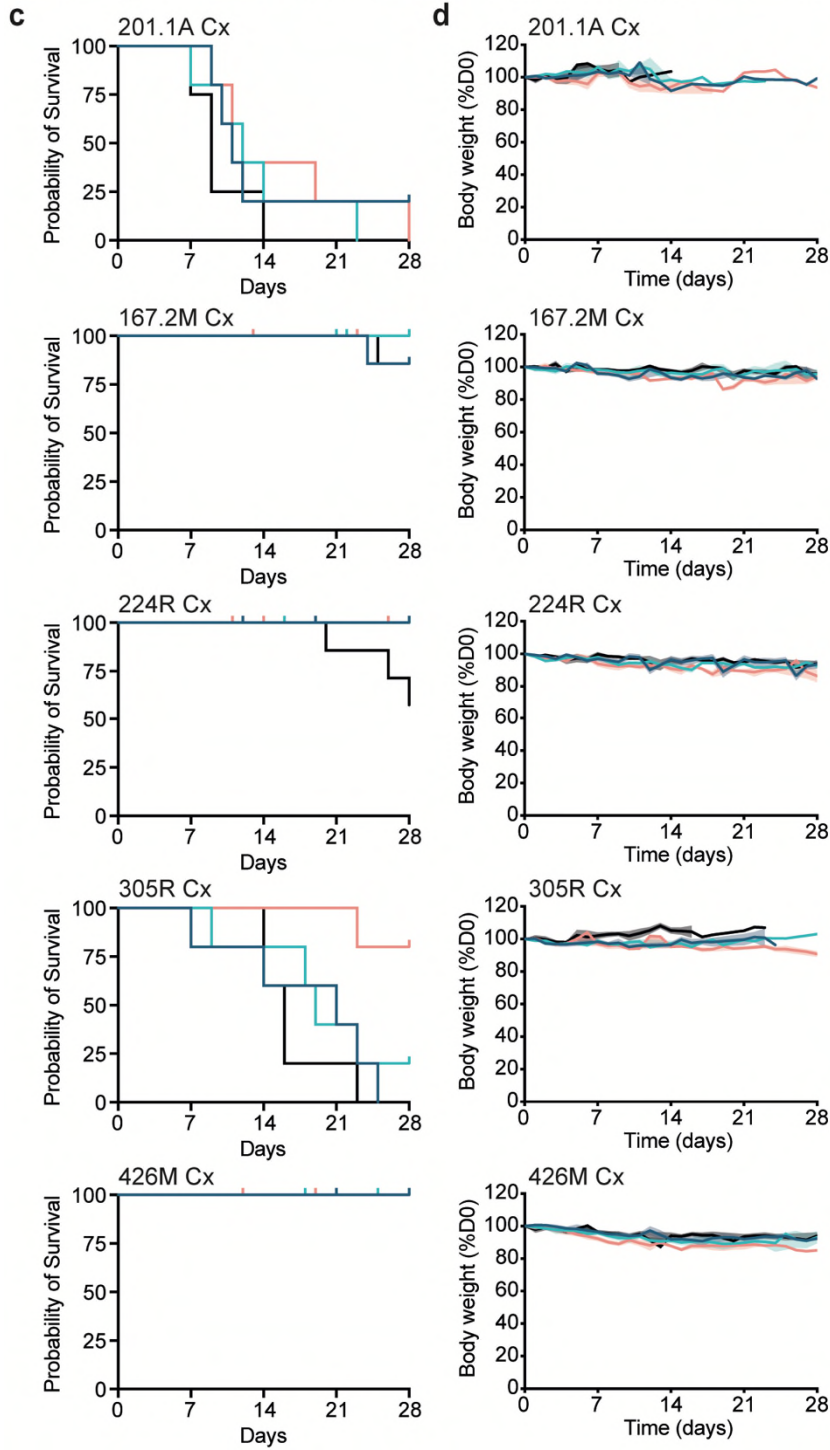

**Supplementary Fig. 6: Individual data for PCTs and volcano plots per patient.**

(a) Graphs show tumor volume (%D0) for PDXs treated with vehicle (dotted line) or combination therapy (solid line) for up to 28 days using the 1x1x1 approach. (b) Waterfall plots of the response of to talazoparib combination therapies in eight research-ready PDXs using the one animal per model per treatment (1x1x1) approach after up to 28 days of treatment. Data presented as the percent change in tumor volume compared to day 0 of treatment (%D0), with a response shown in green (tumor volume regressed to <100% of starting volume), a partial response shown in yellow (tumor volume between 100-300% of starting volume and  $\leq 50\%$  volume of matched vehicle) and no response shown in orange (tumor volume >300% of starting volume), # tumor volume increases over 600% are not represented. (c) Graphs show Kaplan-Meier survival curves and (d) animal body weights for expansion studies treatment of talazoparib and carboplatin combination therapy in five PDXs. Mice were treated for up to 28 days with vehicle (V; black;  $n = 6-8$  grafts), 0.33 mg/kg talazoparib (T; dark blue;  $n = 6-8$  grafts), 50 mg/kg carboplatin (C; light blue;  $n = 6-8$  grafts) or talazoparib and carboplatin (T+C; pink;  $n = 6-8$  grafts). Source data are provided as a Source Data file.

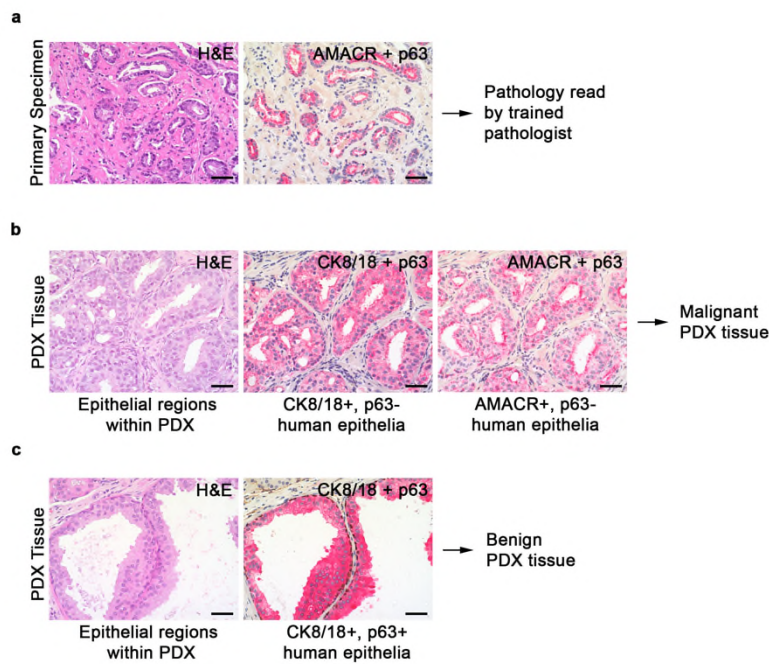

**Supplementary Fig. 7: Pathology assessment of original tissues specimens and PDXs. (a)**

Pathological assessment of original tumor tissue was performed by two independent uropathologists using haematoxylin and eosin (H&E) staining and dual immunohistochemistry for the luminal cell marker AMACR (red) and the basal cell marker p63 (brown). **(b-c)** Tumor take rate in PDXs was assessed using H&E staining and immunohistochemistry for human-specific cytokeratin 8/18 (red), AMACR (red) and p63 (brown). PDX tissue which contained CK8/18+/AMACR+/p63- human epithelia was considered malignant **(b)** and PDX tissue which only contained CK8/18+/p63+ human epithelia were considered benign **(c)**. Scale bars = 100  $\mu$ m. Images are representative, pathology assessment is performed on each primary specimen, and every subsequent PDX generation.

## **Supplementary Tables**

Please refer to Supplementary Information

## **References**

- 1 Gao, D. *et al.* Organoid cultures derived from patients with advanced prostate cancer. *Cell* **159**, 176-187 (2014).
- 2 Armenia, J. *et al.* The long tail of oncogenic drivers in prostate cancer. *Nat. Genet.* **50**, 645-651 (2018).
- 3 Robinson, D. *et al.* Integrative clinical genomics of advanced prostate cancer. *Cell* **161**, 1215-1228 (2015).
- 4 Lawrence, M. G. *et al.* Patient-derived models of abiraterone and enzalutamide-resistant prostate cancer reveal sensitivity to ribosome-directed therapy. *Eur. Urol.* **74**, 562-572 (2018).
